# Supplementary material
Source: PubMed Central journal article supplement (PMC7186162)
Supplement: supp_RA119.011995_157254_1_supp_485758_q6mmmh.pdf [file supp_RA119.011995_157254_1_supp_485758_q6mmmh.pdf]

## Supporting information

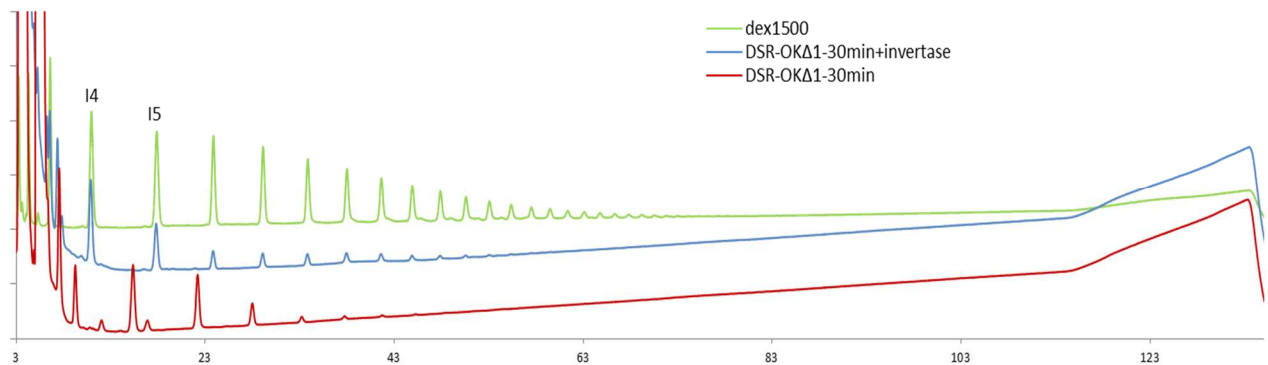

**Figure S1:** Invertase digestion. HPAEC-PAD chromatogram of products formed after 30 min of reaction on 292 mM sucrose by DSR-OK $\Delta$ 1, before (red) and after (blue) digestion with invertase. Commercial dextran 1500 is shown as standard (green).

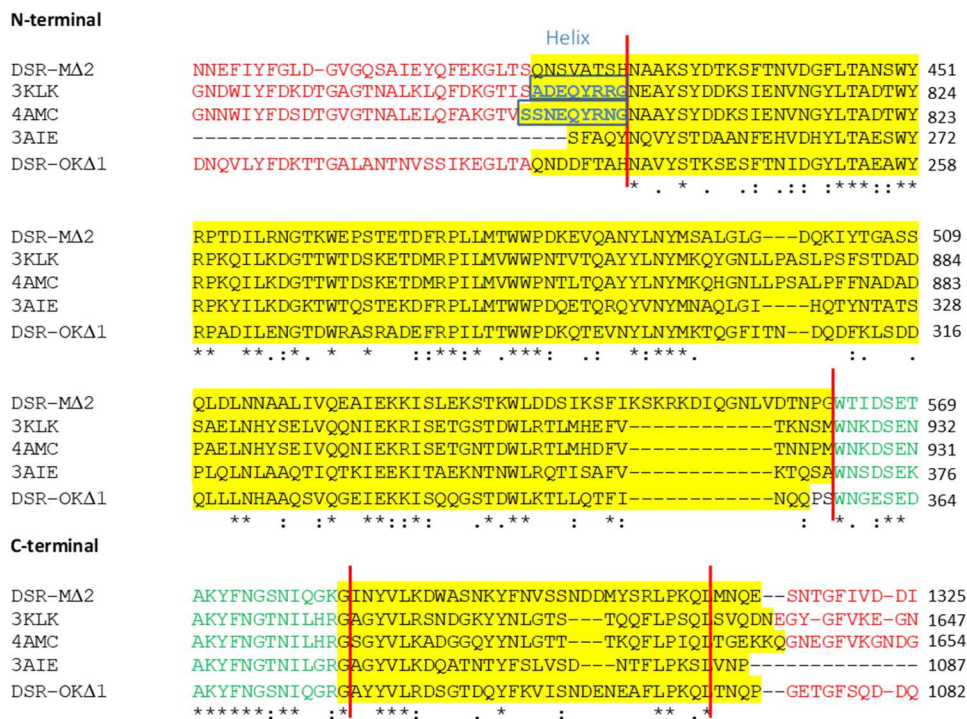

**Figure S2:** Sequence alignment of DSR-OK $\Delta$ 1 and DSR- $\Delta$ 2 with GH70 glucansucrases whose structures have been solved (3KLK: GTF180-DN; 4AMC: GTFA-DN; 3AIE: GTF-SI). Blue boxes correspond to the helix at the beginning of domain IV and red lines indicate the swapping areas. In red, domain V; in green, domain B; in yellow, domain IV.

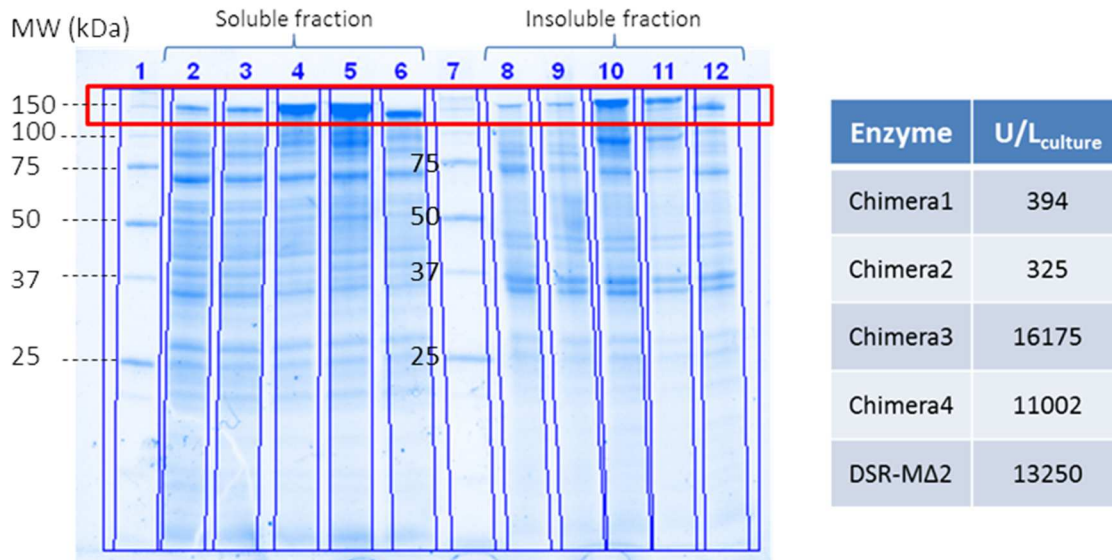

**Figure S3:** Expression levels of chimeric enzymes in comparison with DSR-MΔ2. Lanes 1 and 7: PrecisionPlus Biorad standard, Lanes 2-6: soluble fractions, Lanes 8-12: insoluble fractions. Lanes 2 and 8: chimera 1, lanes 3 and 9: chimera 2, lanes 4 and 10: chimera 3, lanes 5 and 11: chimera 4, lanes 6 and 12: DSR-MΔ2.

**Table S1:** Expression levels in the soluble fraction of DSR-OKΔ1 variants

| Enzyme           | Expression level (U/L <sub>culture</sub> ) |
|------------------|--------------------------------------------|
| DSR-OK           | 18962                                      |
| DSR-OKΔ1         | 18709                                      |
| Y1162A_D         | 5397                                       |
| F1228A_E         | 8392                                       |
| Y1162A-F1228A_DE | 1276                                       |
| Y1354A_F         | 13074                                      |
| Y1420A_G         | 17750                                      |

**Table S2:** Primers used for the construction of the variants of this study (deletion or mutagenesis)

| Primer Name | Nucleotide Sequence                     | Main features                        |
|-------------|-----------------------------------------|--------------------------------------|
| DSR-OKΔ1for | GGAGATATACCATGGCACATGGCGAGTTTGTTAAGG    | Amplification of <i>dsrokΔ1</i> gene |
| DSR-OKΔ1rev | CCTTAACAAACTCGCCATGTGCCATGGTATATCTCC    |                                      |
| DSR-OKΔVfor | CACCCAAAATGATGATTTACAG                  | Deletion of entire domain V          |
| DSR-OKΔVrev | GCCGGGCTGATTAGTCAGC                     |                                      |
| DSR-OKΔ4for | CACCATGGCACATGGCGAGTTTG                 | Deletion of domain V at Cterm end    |
| DSR-OKΔ4rev | GCCGGGCTGATTAGTCAG                      |                                      |
| DSR-OKΔ3for | GCCGCCCTTCACCATGGCACATGGCGAGTTTGTTAAGG  | Deletion of pockets D, E, F and G    |
| DSR-OKΔ3rev | GGCGCGCCACCTTATTAGCAACCTGCCGCCTCTTTGATC |                                      |
| DSR-OKΔ2for | GCCGCCCTTCACCATGGCACATGGCGAGTTTGTTAAGG  | Deletion of pockets F and G          |
| DSR-OKΔ2rev | GGCGCGCCACCTTTGTTTAAAACCGGTCACAATCTGCC  |                                      |
| Y153Arev    | GCGGCGTTATTAAGTGTTC                     | Mutation of Y153 in pocket B         |
| Y153Afor    | GTTAATAACGCCACAG                        |                                      |
| F1098Arev   | CTTGACAGCAGCGTTTTGG                     | Mutation of F1098 in pocket C        |
| F1098Afor   | CGCTGCTGTCCAAGGCGATG                    |                                      |
| Y1162Afor   | CTAATCAGGCTGTGACTGATAC                  | Mutation of Y1162 in pocket D        |
| Y1162Arev   | GTTTCGTATCAGTCACAGCCTG                  |                                      |
| F1228Afor   | GTCAACGAAGCCAAGGGC                      | Mutation of F1228 in pocket E        |
| F1228Arev   | CGCTGCCCTTGCTTCG                        |                                      |
| F1354Afor   | TGATCACAAATCGTGCCATGCGC                 | Mutation of F1354 in pocket F        |
| F1354Arev   | CCGGCGCATGGCACGATTTG                    |                                      |
| Y1420Afor   | GACGCCTTCTCCCAGAC                       | Mutation of Y1420 in pocket G        |
| Y1420Arev   | GGAGAAGGCGTCATTTGTGAC                   |                                      |

**Table S3:** Primers used for chimera constructions

|           |       | Primer name          | Primer sequence                               | template             | size of the fragment (bp) |
|-----------|-------|----------------------|-----------------------------------------------|----------------------|---------------------------|
| Chimera 1 | PCR 1 | DSROK-IV Fwd         | GTGTTGCTACAAGTCATAATGCCGTTTATTCGACC           | pET55- <i>dsrok</i>  | 2538                      |
|           |       | DSROK-IV Rev         | TATTTGACTCTTGATTCATCAGCTGTTTAGGCAGAAATG       |                      |                           |
|           | PCR 2 | pET-55-DSRM-V Fwd    | ATGAATCAAGAGTCAAATACTG                        | pET55- <i>dsrmΔ1</i> | 6740                      |
|           |       | pET-55-DSRM-V Rev    | ATGACTTGTAGCAAACTG                            |                      |                           |
| Chimera 2 | PCR 1 | DSROK Fwd            | GACACCAACCCAGGGTGGAAATGGGGAAAGTGAAGATCC       | pET55- <i>dsrok</i>  | 2079                      |
|           |       | DSROK Rev            | GTCTTTTAAGACGTAGTTGATCCACGGCCCTGGATGTT        |                      |                           |
|           | PCR 2 | pET55-DSRM-IV-V Fwd  | ATCAACTACGTCTTAAAAGACTGG                      | pET55- <i>dsrmΔ1</i> | 7231                      |
|           |       | pET55-DSRM-IV-V Rev  | CCCTGGGTTGGTGTCTAC                            |                      |                           |
| Chimera 3 | PCR 1 | DSRM-IV Fwd          | GATGATTTACAGCTCATAAAGCTGCAAAGTCTTATGATACCAAAG | pET55- <i>dsrmΔ1</i> | 2685                      |
|           |       | DSRM-IV Rev          | GCCGGGCTGATTAGTAAGCTGCTTGGGCAGACG             |                      |                           |
|           | PCR 2 | pET55-DSROK-V Fwd    | ACTAATCAGCCCCGGCGAA                           | pET55- <i>dsrok</i>  | 7166                      |
|           |       | pET55-DSROK-V Rev    | ATGAGCTGTGAAATCATCATTTTG                      |                      |                           |
| Chimera 4 | PCR 1 | DSRM Fwd             | AACCAGCAGCCCTCTGGACGATTGATAGTAAAC             | pET55- <i>dsrmΔ1</i> | 2194                      |
|           |       | DSRM Rev             | CGCGCAGCACATAATAAGCTCCTTTTCCTGAATGTTAG        |                      |                           |
|           | PCR 2 | pET55-DSROK-IV-V Fwd | GCTTATTATGTGCTGCGC                            | pET55- <i>dsrok</i>  | 7625                      |
|           |       | pET55-DSROK-IV-V Rev | AGAGGGCTGCTGGTTGAT                            |                      |                           |
